# Supplementary figures and images for: An impedance-based flow microcytometer for single cell morphology discrimination
Source: Royal Society of Chemistry journal article supplement (doi:10.1039/c4lc00221k), 2014-01-01

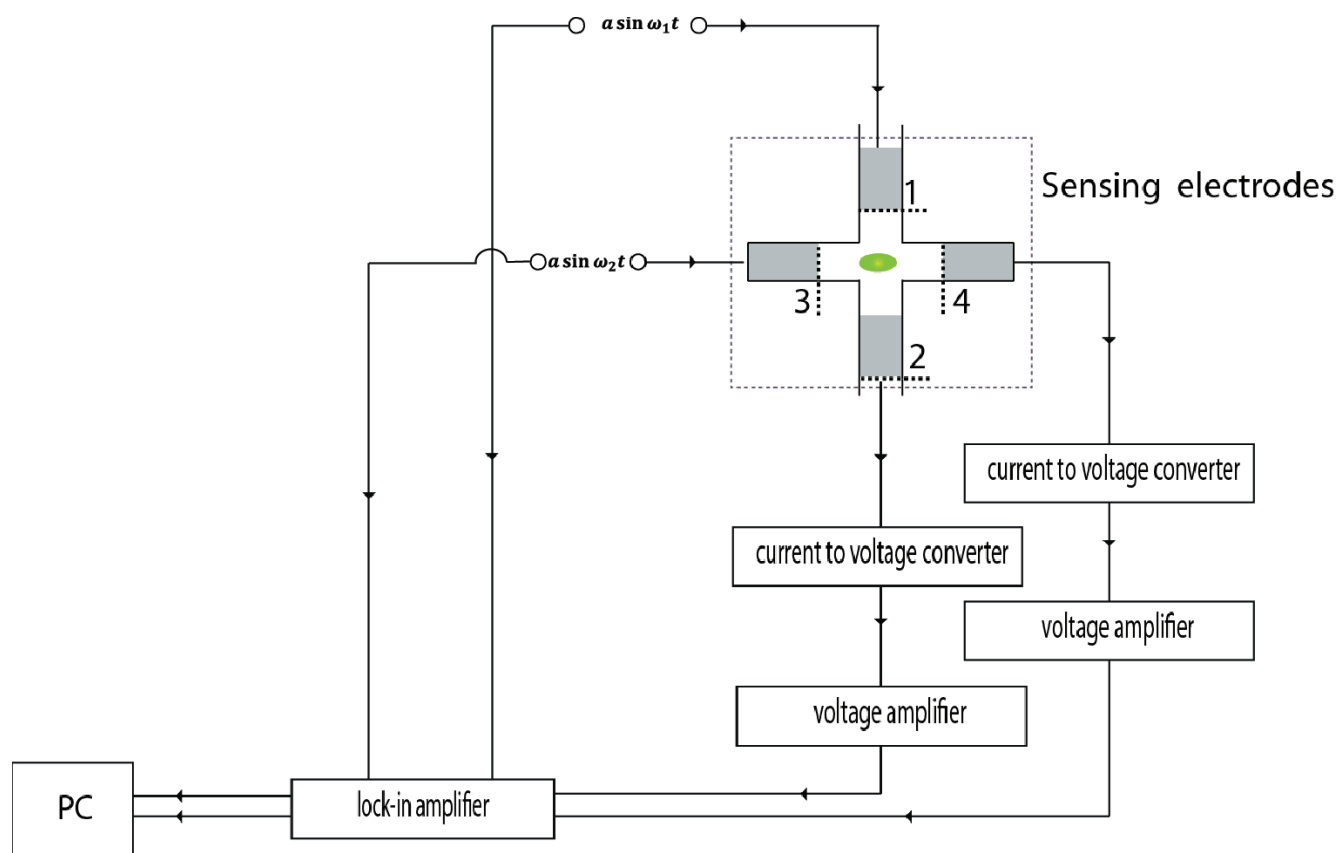

Supplement: c4lc00221k1.pdf [file c4lc00221k1.pdf]

(a)

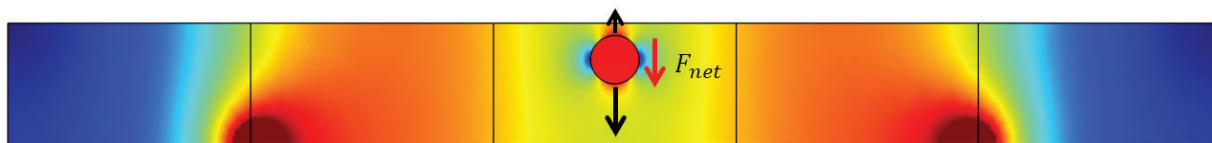

(b)

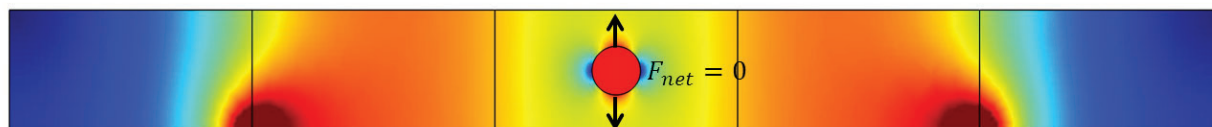

(c)

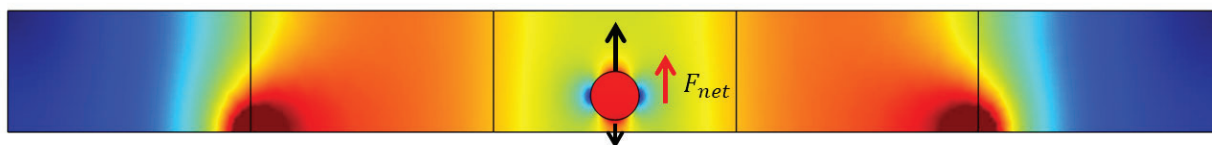

20μm

Supplement: c4lc00221k2.pdf [file c4lc00221k2.pdf]

(a)

CH1 - LONGITUDINAL CHANNEL

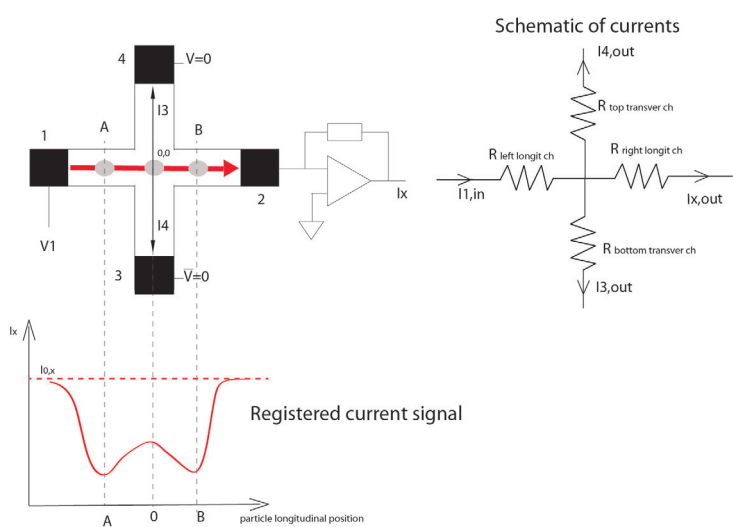

(b)

CH2 - TRANSVERSE CHANNEL

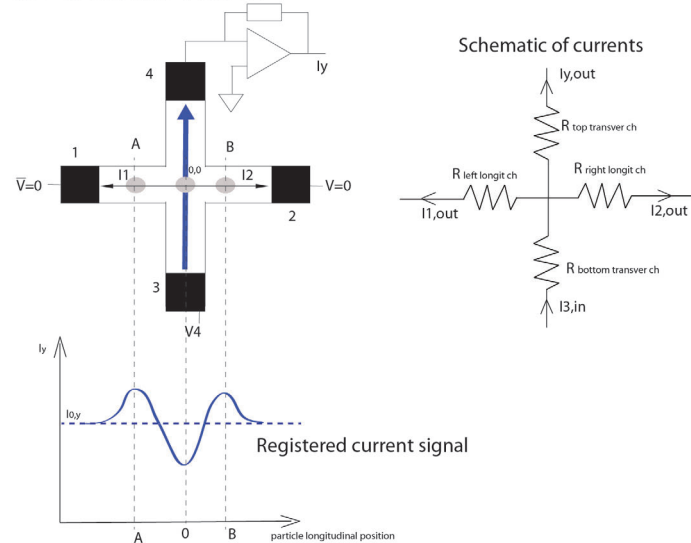

Supplement: c4lc00221k3.pdf [file c4lc00221k3.pdf]

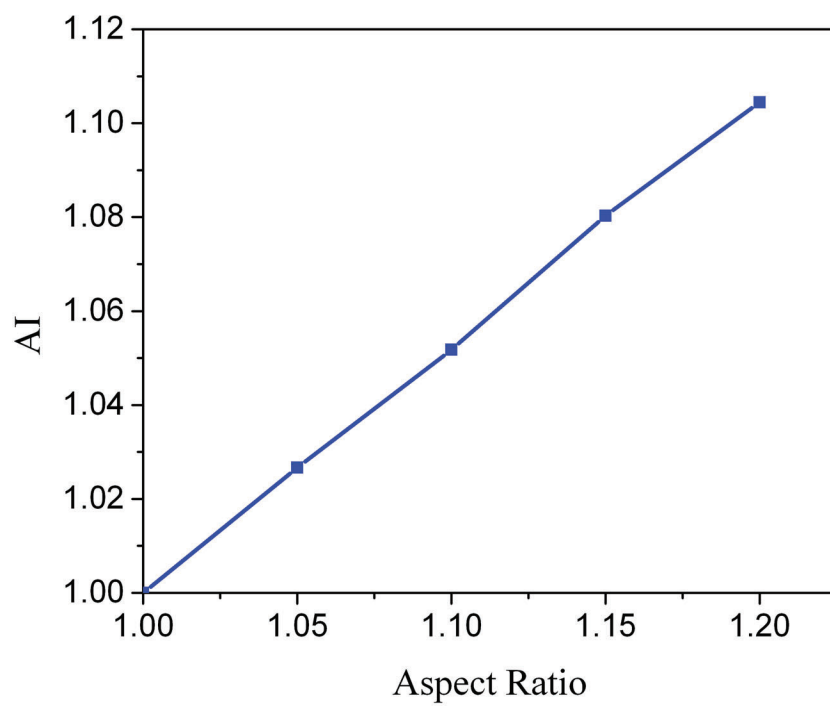

Supplement: c4lc00221k4.pdf [file c4lc00221k4.pdf]
